# Supplementary material for: Viral and host network analysis of the human cytomegalovirus transcriptome in latency
Source: PubMed Central journal article supplement — bioRxiv. 2024 May 21:2024.05.21.594597. Preprint. [Version 1] doi: 10.1101/2024.05.21.594597 (PMC11142044; doi:10.1101/2024.05.21.594597), 2024-05-21
Supplement: NIHPP2024.05.21.594597v1-supplement-1.pdf [file NIHPP2024.05.21.594597v1-supplement-1.pdf]

**Supplementary Figure 1. RT-qPCR confirmation of select transcripts in WT infection.**

THP-1 cells were infected with WT HCMV (MOI = 2) and cultured in suspension cell dishes.

Total RNA was collected at 1 dpi during the establishment of latency. At 5 dpi, cell cultures

were divided and treated with TPA (reactivation) to trigger re-expression of viral genes or

DMSO (latency) to maintain the latent infection. Total RNA was collected from suspension cells

(latency) and from adherent cells (reactivation) at 7dpi. RT-qPCR was performed to quantify

viral transcripts and confirm the patterns of viral gene expression observed in the RNA-Seq

analysis. Viral transcripts from each gene expression cluster (this study) and three canonical

kinetic gene classes (IE, E, L) were selected. Data are expressed as ratio of viral transcripts over the cellular transcript H6PD and represent a single biological replicate analyzed in triplicate.

**Supplementary Figure 2. Comparison of representative ULb' transcripts in hematopoietic**

**versus replication-permissive cells. A)** THP-1 cells were infected with WT,  $\Delta ULI38_{STOP}$ , or  $\Delta ULI35_{STOP}$  HCMV (MOI = 2) and cultured in suspension cell dishes to establish latent infection. At 5 dpi, cells were treated with TPA to trigger re-expression of viral genes or with DMSO to maintain latent infection. Total RNA was isolated at the indicated time points and RT-qPCR was used to quantitate representative ULb' transcripts *ULI35* and *ULI38*. Data are shown as the ratio of each viral transcript over cellular H6PD and represent a single biological replicate analyzed in triplicate and used to confirm viral gene expression patterns observed in the RNA-Seq analysis. **B)** MRC-5 fibroblasts were infected with WT or  $\Delta ULI35_{STOP}$  HCMV (MOI = 1) to establish replicative infection. Total RNA was collected at the indicated time points and RT-qPCR was used to quantify *ULI35* and *ULI38* transcripts. Data are expressed as fold change in viral transcripts over WT infection at 24 hours post infection (hpi). Error bars represent the SEM between three biological replicates analyzed in duplicate. Multiple t-tests (one per time point) were performed using the Holm-Sidak correction for multiple comparisons. Statistical significance where \*,  $P < 0.05$ .

**Supplementary Data Set 1. Simple Enrichment Analysis.** Simple Enrichment Analysis (SEA)

(66) was performed against the CIS-BP database of transcription factors (67) to identify transcription factor binding motifs that are significantly enriched in viral gene expression cluster 4 when compared to other viral gene expression clusters. The degree of significance for which

each transcription factor is enriched in cluster 4 is expressed as a p-value. The percentage of cluster 4 HCMV genes associated with each predicted transcription factor binding site is shown (% HCMV c4 genes) as well as percent of HCMV genes from clusters 1, 2, and 3 (% HCMV c1, 2, 3, genes). Enrichment ratio represents the relative enrichment of each transcription factor binding site in cluster 4 versus clusters 1, 2, and 3. Figure quality images depicting the motif consensus sequences identified in cluster 4 genes were created using the WebLogo web-based application (71, 72).

**Supplementary Data Set 2. Differential Expression Analysis.** Transcription factors corresponding to the significantly enriched transcription factor binding sites in cluster 4 were ranked by degree of differential expression at each time point dependent on the presence of pUL135 in our RNA-Seq analysis. Negative binomial modeling of gene expression with the *DESeq2* package from R (68) was used to determine differential expression. Log fold change (logFC) of gene expression for *UL135*<sub>STOP</sub> virus over viruses expressing the UL135 protein (WT and *UL138*<sub>STOP</sub> averaged) is shown. Statistical significance where \*,  $P < 0.05$ ; \*\*,  $P < 0.005$  and \*\*\*,  $P < 0.0005$ .

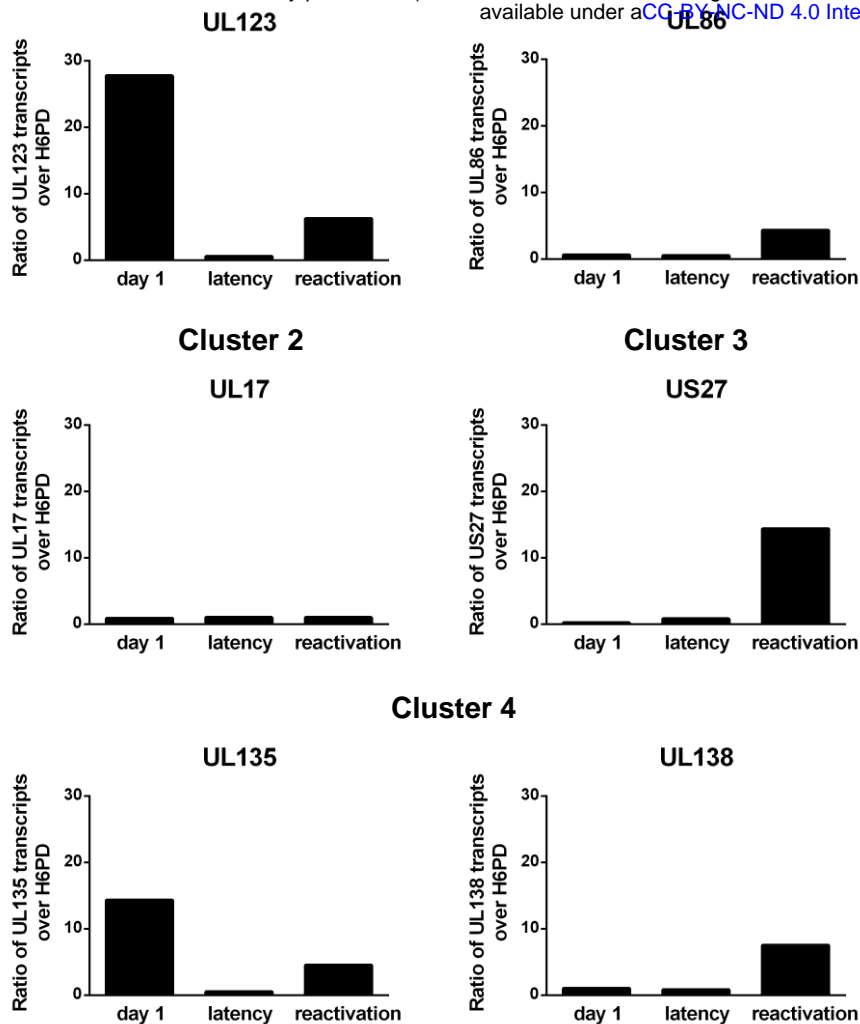

**A.** THP-1 Monocyte/Macrophage

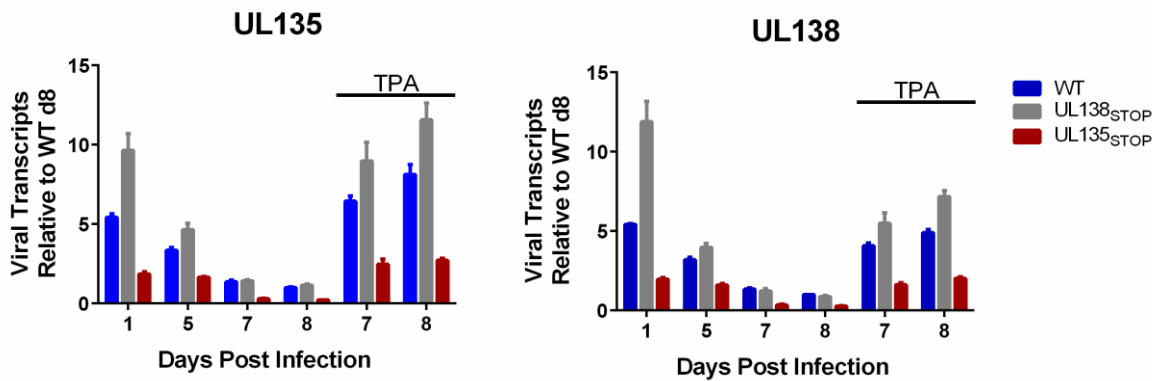

**B.** MRC-5 Fibroblast

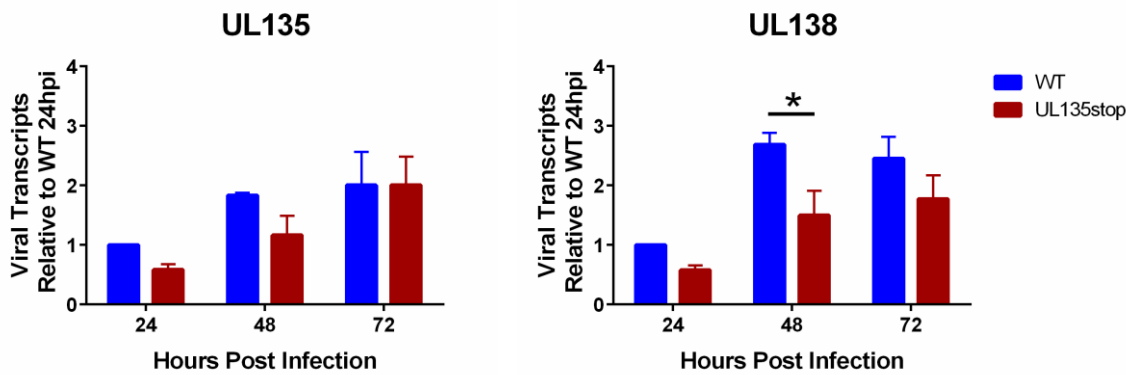

| Motif Consensus                                                                     | Gene Symbol | p-value              | % HCMV c4 Genes | % HCMV c1, 2, 3 Genes | Enrich Ratio |
|-------------------------------------------------------------------------------------|-------------|----------------------|-----------------|-----------------------|--------------|
|    | CXXC1       | 2.27 e <sup>-4</sup> | 58.3 %          | 8.6 %                 | 6.73         |
|    | PPARG       | 3.05 e <sup>-4</sup> | 25 %            | 0 %                   | 47.08        |
|    | TFAP2A      | 3.05 e <sup>-4</sup> | 25 %            | 0 %                   | 47.08        |
|    | ZNF23       | 4.40 e <sup>-4</sup> | 58.3 %          | 9.2 %                 | 6.28         |
|   | ZNF524      | 7.00 e <sup>-4</sup> | 75 %            | 20.4 %                | 3.68         |
|  | PLAG1       | 8.77 e <sup>-4</sup> | 75 %            | 21.1 %                | 3.57         |
|  | TFAP2C      | 1.17 e <sup>-3</sup> | 25 %            | 0.7 %                 | 23.54        |
|  | ZNF100      | 1.37 e <sup>-3</sup> | 75 %            | 21.7 %                | 3.46         |
|  | IRF3        | 1.39 e <sup>-3</sup> | 50 %            | 7.9 %                 | 6.34         |

| Motif Consensus                                                                     | Gene Symbol | p-value              | % Cluster 4 Genes | % HCMV c1, 2, 3 Genes | Enrich Ratio |
|-------------------------------------------------------------------------------------|-------------|----------------------|-------------------|-----------------------|--------------|
|    | IRF9        | 1.62 e <sup>-3</sup> | 41.7 %            | 5.3 %                 | 7.85         |
|    | ZNF662      | 1.96 e <sup>-3</sup> | 50 %              | 8.6 %                 | 5.88         |
|    | ZSCAN22     | 2.02 e <sup>-3</sup> | 33.3 %            | 2.6 %                 | 11.77        |
|    | ESR1        | 2.80 e <sup>-3</sup> | 25 %              | 1.3 %                 | 15.69        |
|   | ZNF429      | 3.45 e <sup>-3</sup> | 58.3 %            | 14.5 %                | 4.09         |
|  | EGR1        | 3.71 e <sup>-3</sup> | 75 %              | 24.3 %                | 3.10         |
|  | TIGD1       | 4.94 e <sup>-3</sup> | 16.7 %            | 0 %                   | 35.31        |
|  | TBX19       | 4.94 e <sup>-3</sup> | 16.7 %            | 0 %                   | 35.31        |
|  | ZNF594      | 4.94 e <sup>-3</sup> | 16.7 %            | 0 %                   | 35.31        |

| Motif Consensus                                                                                                                       | Gene Symbol | p-value              | % Cluster 4 Genes | % HCMV c1, 2, 3 Genes | Enrich Ratio |
|---------------------------------------------------------------------------------------------------------------------------------------|-------------|----------------------|-------------------|-----------------------|--------------|
| <p>bits</p> <p>2</p> <p>1</p> <p>0</p> <p>5' 1 2 3 4 5 6 7 8 9 10 11 12 13 14 15 16 17 18 3'</p> <p>weblogo.berkeley.edu</p>          | ZNF684      | 5.36 e <sup>-3</sup> | 25 %              | 2 %                   | 11.77        |
| <p>bits</p> <p>2</p> <p>1</p> <p>0</p> <p>5' 1 2 3 4 5 6 7 8 9 10 11 12 13 14 15 16 17 18 19 20 21 3'</p> <p>weblogo.berkeley.edu</p> | ZNF584      | 5.36 e <sup>-3</sup> | 25 %              | 2 %                   | 11.77        |
| <p>bits</p> <p>2</p> <p>1</p> <p>0</p> <p>5' 1 2 3 4 5 6 7 8 3'</p> <p>weblogo.berkeley.edu</p>                                       | CDX1        | 5.59 e <sup>-3</sup> | 25 %              | 1.3 %                 | 15.69        |
| <p>bits</p> <p>2</p> <p>1</p> <p>0</p> <p>5' 1 2 3 4 5 6 7 8 9 10 11 12 13 14 15 16 3'</p> <p>weblogo.berkeley.edu</p>                | EGR4        | 6.31 e <sup>-3</sup> | 50 %              | 11.2 %                | 4.58         |
| <p>bits</p> <p>2</p> <p>1</p> <p>0</p> <p>5' 1 2 3 4 5 6 7 8 9 10 11 12 13 14 15 16 17 18 19 20 21 3'</p> <p>weblogo.berkeley.edu</p> | ZNF548      | 8.36 e <sup>-3</sup> | 33.3 %            | 3.9 %                 | 8.41         |
| <p>bits</p> <p>2</p> <p>1</p> <p>0</p> <p>5' 1 2 3 4 5 6 7 8 9 10 11 3'</p> <p>weblogo.berkeley.edu</p>                               | SOX12       | 8.41 e <sup>-3</sup> | 50 %              | 11.2 %                | 4.58         |
| <p>bits</p> <p>2</p> <p>1</p> <p>0</p> <p>5' 1 2 3 4 5 6 7 8 9 3'</p> <p>weblogo.berkeley.edu</p>                                     | EGR2        | 8.99 e <sup>-3</sup> | 75 %              | 28.3 %                | 2.67         |



|                        | gene symbol     | ensembl         | logFC UL135 <sub>STOP</sub> /avg(WT+UL138 <sub>STOP</sub> ) | AvgExpr  | t        | p Value    | adj p Value | B          |
|------------------------|-----------------|-----------------|-------------------------------------------------------------|----------|----------|------------|-------------|------------|
| Day 1 undifferentiated | TFAP2C          | ENSG00000087510 | -1.160202415                                                | 0.190043 | -4.15709 | 6.1343708  | 0.0008556   | 0.963543** |
|                        | PPARG           | ENSG00000132170 | 0.370753256                                                 | 5.218841 | 3.523475 | 0.000607   | 0.0062923   | -1.20051*  |
|                        | CXXC1           | ENSG00000154832 | 0.157189768                                                 | 5.641158 | 1.239288 | 0.217696   | 0.49348942  | -6.34767   |
|                        | ZNF524          | ENSG00000171443 | 0.295048003                                                 | 3.084672 | 0.908604 | 0.36541    | 0.64959332  | -6.69994   |
|                        | ZNF100          | ENSG00000197020 | 0.088718788                                                 | 4.539584 | 0.52154  | 0.602968   | 0.81698032  | -6.97596   |
|                        | PLAG1           | ENSG00000181690 | 0.135495698                                                 | 1.077953 | 0.49638  | 0.620549   | 0.8270811   | -6.98876   |
|                        | IRF3            | ENSG00000126456 | -0.068330399                                                | 5.866038 | -0.43323 | 0.665636   | 0.85339777  | -7.01811   |
|                        | ZNF23           | ENSG00000167377 | -0.065414956                                                | -2.07581 | -0.14147 | 0.887738   | 0.95776564  | -7.10203   |
| TFAP2A                 | ENSG00000137203 | -0.023972528    | 1.000728                                                    | -0.12839 | 0.898057 | 0.96195426 | -7.1038     |            |

|                        | gene symbol | ensembl         | logFC UL135 <sub>STOP</sub> /avg(WT+UL138 <sub>STOP</sub> ) | AvgExpr  | t        | p Value  | adj p Value | B        |
|------------------------|-------------|-----------------|-------------------------------------------------------------|----------|----------|----------|-------------|----------|
| Day 3 undifferentiated | TFAP2C      | ENSG00000087510 | -0.798834005                                                | 0.190043 | -2.86228 | 0.004977 | 0.12550995  | -2.57596 |
|                        | IRF3        | ENSG00000126456 | -0.198747266                                                | 5.866038 | -1.26011 | 0.210115 | 0.77750388  | -5.69694 |
|                        | PPARG       | ENSG00000132170 | 0.093190801                                                 | 5.218841 | 0.885644 | 0.377609 | 0.88944352  | -6.08861 |
|                        | CXXC1       | ENSG00000154832 | -0.099681904                                                | 5.641158 | -0.78589 | 0.433503 | 0.91307676  | -6.17022 |
|                        | TFAP2A      | ENSG00000137203 | 0.115498875                                                 | 1.000728 | 0.618592 | 0.537377 | 0.94725838  | -6.28544 |
|                        | ZNF524      | ENSG00000171443 | -0.197595561                                                | 3.084672 | -0.6085  | 0.544026 | 0.94947014  | -6.29152 |
|                        | PLAG1       | ENSG00000181690 | -0.152047787                                                | 1.077953 | -0.55702 | 0.57857  | 0.95464582  | -6.32098 |
|                        | ZNF100      | ENSG00000197020 | 0.081226818                                                 | 4.539584 | 0.477498 | 0.63389  | 0.96730839  | -6.3614  |
|                        | ZNF23       | ENSG00000167377 | 0.216359789                                                 | -2.07581 | 0.467919 | 0.640705 | 0.96850953  | -6.36585 |

|                        | gene symbol | ensembl         | logFC UL135 <sub>STOP</sub> /avg(WT+UL138 <sub>STOP</sub> ) | AvgExpr  | t        | p Value  | adj p Value | B        |
|------------------------|-------------|-----------------|-------------------------------------------------------------|----------|----------|----------|-------------|----------|
| Day 5 undifferentiated | CXXC1       | ENSG00000154832 | -0.225505293                                                | 5.641158 | -1.77789 | 0.077996 | 0.35376617  | -4.63076 |
|                        | PPARG       | ENSG00000132170 | 0.16329105                                                  | 5.218841 | 1.551846 | 0.123375 | 0.43551737  | -4.98393 |
|                        | PLAG1       | ENSG00000181690 | 0.411142146                                                 | 1.077953 | 1.506194 | 0.134688 | 0.45417076  | -5.04969 |
|                        | TFAP2A      | ENSG00000137203 | -0.247783589                                                | 1.000728 | -1.32709 | 0.187041 | 0.52213634  | -5.28939 |
|                        | ZNF524      | ENSG00000171443 | -0.387980027                                                | 3.084672 | -1.19479 | 0.234564 | 0.57186158  | -5.44757 |
|                        | IRF3        | ENSG00000126456 | -0.148654527                                                | 5.866038 | -0.94251 | 0.347857 | 0.67176677  | -5.70418 |
|                        | TFAP2C      | ENSG00000087510 | -0.152089103                                                | 0.190043 | -0.54495 | 0.586818 | 0.82580627  | -5.98702 |
|                        | ZNF23       | ENSG00000167377 | 0.229986979                                                 | -2.07581 | 0.49739  | 0.619839 | 0.84332314  | -6.0108  |
|                        | ZNF100      | ENSG00000197020 | 0.029735345                                                 | 4.539584 | 0.174801 | 0.861535 | 0.95074931  | -6.11493 |

|                          | gene symbol | ensembl         | logFC UL135 <sub>STOP</sub> /avg(WT+UL138 <sub>STOP</sub> ) | AvgExpr  | t        | p Value  | adj p Value | B        |
|--------------------------|-------------|-----------------|-------------------------------------------------------------|----------|----------|----------|-------------|----------|
| Day 5.5 undifferentiated | PPARG       | ENSG00000132170 | 0.182528313                                                 | 5.218841 | 1.734669 | 0.085409 | 0.60943602  | -4.53355 |
|                          | ZNF23       | ENSG00000167377 | -0.61479136                                                 | -2.07581 | -1.3296  | 0.186212 | 0.76088461  | -5.10337 |
|                          | TFAP2C      | ENSG00000087510 | -0.365373922                                                | 0.190043 | -1.30916 | 0.193021 | 0.76862837  | -5.12827 |
|                          | CXXC1       | ENSG00000154832 | -0.157928606                                                | 5.641158 | -1.24511 | 0.215555 | 0.79077285  | -5.20389 |
|                          | PLAG1       | ENSG00000181690 | 0.196650438                                                 | 1.077953 | 0.720417 | 0.472692 | 0.91338257  | -5.6831  |
|                          | ZNF100      | ENSG00000197020 | 0.098327204                                                 | 4.539584 | 0.578023 | 0.564349 | 0.93868392  | -5.76948 |
|                          | TFAP2A      | ENSG00000137203 | -0.104598384                                                | 1.000728 | -0.56021 | 0.576397 | 0.94173547  | -5.77897 |
|                          | IRF3        | ENSG00000126456 | -0.041989988                                                | 5.866038 | -0.26623 | 0.790528 | 0.98121094  | -5.89272 |
|                          | ZNF524      | ENSG00000171443 | -0.065643849                                                | 3.084672 | -0.20215 | 0.840147 | 0.98379825  | -5.90679 |

|                        | gene symbol | ensembl         | logFC UL135 <sub>STOP</sub> /avg(WT+UL138 <sub>STOP</sub> ) | AvgExpr  | t        | p Value  | adj p Value | B        |
|------------------------|-------------|-----------------|-------------------------------------------------------------|----------|----------|----------|-------------|----------|
| Day 6 undifferentiated | TFAP2A      | ENSG00000137203 | 0.20669957                                                  | 1.000728 | 1.107047 | 0.270524 | 0.92464593  | -5.18008 |
|                        | TFAP2C      | ENSG00000087510 | 0.235149384                                                 | 0.190043 | 0.842558 | 0.401179 | 0.95999793  | -5.4112  |
|                        | ZNF524      | ENSG00000171443 | 0.183991866                                                 | 3.084672 | 0.566605 | 0.572058 | 0.9773683   | -5.58622 |
|                        | PPARG       | ENSG00000132170 | 0.053351166                                                 | 5.218841 | 0.507026 | 0.613082 | 0.98007183  | -5.61507 |
|                        | ZNF23       | ENSG00000167377 | -0.183838918                                                | -2.07581 | -0.39759 | 0.691653 | 0.98577356  | -5.65976 |
|                        | PLAG1       | ENSG00000181690 | 0.058973258                                                 | 1.077953 | 0.216045 | 0.829326 | 0.99296086  | -5.71009 |
|                        | ZNF100      | ENSG00000197020 | -0.035209278                                                | 4.539584 | -0.20698 | 0.836382 | 0.9940531   | -5.71182 |
|                        | IRF3        | ENSG00000126456 | 0.028346522                                                 | 5.866038 | 0.179724 | 0.857677 | 0.9977019   | -5.71659 |
|                        | CXXC1       | ENSG00000154832 | 0.005258322                                                 | 5.641158 | 0.041457 | 0.967002 | 0.99883043  | -5.73042 |

|                        | gene symbol     | ensembl         | logFC UL135 <sub>STOP</sub> /avg(WT+UL138 <sub>STOP</sub> ) | AvgExpr  | t        | p Value    | adj p Value | B        |
|------------------------|-----------------|-----------------|-------------------------------------------------------------|----------|----------|------------|-------------|----------|
| Day 8 undifferentiated | CXXC1           | ENSG00000154832 | 0.284361045                                                 | 5.641158 | 2.190365 | 0.030463   | 0.46870048  | -3.61542 |
|                        | TFAP2A          | ENSG00000137203 | 0.293741114                                                 | 1.000728 | 1.537056 | 0.126955   | 0.62803435  | -4.68428 |
|                        | TFAP2C          | ENSG00000087510 | 0.418787284                                                 | 0.190043 | 1.466046 | 0.145294   | 0.64438295  | -4.77901 |
|                        | ZNF23           | ENSG00000167377 | 0.463869989                                                 | -2.07581 | 0.980142 | 0.32902    | 0.77719166  | -5.31046 |
|                        | ZNF524          | ENSG00000171443 | 0.306699358                                                 | 3.084672 | 0.922769 | 0.358009   | 0.79291867  | -5.35956 |
|                        | IRF3            | ENSG00000126456 | 0.127334203                                                 | 5.866038 | 0.78877  | 0.431827   | 0.83183543  | -5.46288 |
|                        | ZNF100          | ENSG00000197020 | -0.09500345                                                 | 4.539584 | -0.54564 | 0.58634    | 0.89476917  | -5.60941 |
|                        | PPARG           | ENSG00000132170 | -0.05424017                                                 | 5.218841 | -0.50362 | 0.615465   | 0.90637544  | -5.62936 |
| PLAG1                  | ENSG00000181690 | -0.020320356    | 1.077953                                                    | -0.07273 | 0.942143 | 0.98848408 | -5.74187    |          |

|                        | gene symbol | ensembl         | logFC UL135 <sub>STOP</sub> /avg(WT+UL138 <sub>STOP</sub> ) | AvgExpr  | t        | p Value  | adj p Value | B        |
|------------------------|-------------|-----------------|-------------------------------------------------------------|----------|----------|----------|-------------|----------|
| Day 5.5 differentiated | TFAP2C      | ENSG00000087510 | 0.464213495                                                 | 0.190043 | 1.663311 | 0.098902 | 0.71881807  | -4.78323 |
|                        | PLAG1       | ENSG00000181690 | -0.392897379                                                | 1.077953 | -1.43936 | 0.152696 | 0.85336045  | -5.10905 |
|                        | TFAP2A      | ENSG00000137203 | -0.09065915                                                 | 1.000728 | -0.48555 | 0.628183 | 0.99991207  | -5.97955 |
|                        | PPARG       | ENSG00000132170 | 0.044178342                                                 | 5.218841 | 0.419851 | 0.675357 | 0.99991207  | -6.00799 |
|                        | IRF3        | ENSG00000126456 | -0.054938401                                                | 5.866038 | -0.34832 | 0.728217 | 0.99991207  | -6.03427 |
|                        | ZNF524      | ENSG00000171443 | -0.110408863                                                | 3.084672 | -0.34001 | 0.734457 | 0.99991207  | -6.03701 |
|                        | ZNF23       | ENSG00000167377 | -0.139931741                                                | -2.07581 | -0.30263 | 0.762705 | 0.99991207  | -6.04851 |
|                        | CXXC1       | ENSG00000154832 | 0.027335438                                                 | 5.641158 | 0.215513 | 0.829739 | 0.99991207  | -6.07011 |
|                        | ZNF100      | ENSG00000197020 | -0.018806493                                                | 4.539584 | -0.11056 | 0.912157 | 0.99991207  | -6.0865  |

|                      | gene symbol | ensembl         | logFC UL135 <sub>STOP</sub> /avg(WT+UL138 <sub>STOP</sub> ) | AvgExpr  | t        | p Value  | adj p Value | B        |
|----------------------|-------------|-----------------|-------------------------------------------------------------|----------|----------|----------|-------------|----------|
| Day 6 differentiated | PPARG       | ENSG00000132170 | -0.308388064                                                | 5.218841 | -2.93078 | 0.00406  | 0.08845639  | -2.20072 |
|                      | TFAP2A      | ENSG00000137203 | 0.26509314                                                  | 1.000728 | 1.419793 | 0.158303 | 0.53608525  | -5.24294 |
|                      | TFAP2C      | ENSG00000087510 | 0.345174731                                                 | 0.190043 | 1.236787 | 0.21862  | 0.59882606  | -5.47478 |
|                      | ZNF23       | ENSG00000167377 | -0.555554661                                                | -2.07581 | -1.20149 | 0.231965 | 0.60874713  | -5.51592 |
|                      | PLAG1       | ENSG00000181690 | -0.295316164                                                | 1.077953 | -1.08187 | 0.281514 | 0.64704137  | -5.6467  |
|                      | CXXC1       | ENSG00000154832 | 0.116318301                                                 | 5.641158 | 0.917057 | 0.360982 | 0.70548616  | -5.80486 |
|                      | IRF3        | ENSG00000126456 | 0.143897732                                                 | 5.866038 | 0.912349 | 0.363444 | 0.70687041  | -5.809   |
|                      | ZNF524      | ENSG00000171443 | 0.248932154                                                 | 3.084672 | 0.76659  | 0.444855 | 0.75501121  | -5.92678 |
|                      | ZNF100      | ENSG00000197020 | 0.084999029                                                 | 4.539584 | 0.499673 | 0.618235 | 0.84770069  | -6.08987 |

|                      | gene symbol     | ensembl         | logFC UL135 <sub>STOP</sub> /avg(WT+UL138 <sub>STOP</sub> ) | AvgExpr  | t        | p Value    | adj p Value | B           |
|----------------------|-----------------|-----------------|-------------------------------------------------------------|----------|----------|------------|-------------|-------------|
| Day 8 differentiated | PPARG           | ENSG00000132170 | -0.533937604                                                | 5.218841 | -5.07431 | 1.4632583  | 0.00027186  | 5.018128*** |
|                      | TFAP2A          | ENSG00000137203 | 0.374334215                                                 | 1.000728 | 2.004869 | 0.047264   | 0.3996679   | -4.36901    |
|                      | TFAP2C          | ENSG00000087510 | 0.458430353                                                 | 0.190043 | 1.64259  | 0.103128   | 0.56369915  | -4.99464    |
|                      | ZNF100          | ENSG00000197020 | -0.231246487                                                | 4.539584 | -1.3594  | 0.176611   | 0.68461188  | -5.40089    |
|                      | PLAG1           | ENSG00000181690 | -0.369958488                                                | 1.077953 | -1.35532 | 0.177902   | 0.68711741  | -5.4062     |
|                      | ZNF23           | ENSG00000167377 | -0.610993475                                                | -2.07581 | -1.32139 | 0.188926   | 0.70162407  | -5.44978    |
|                      | CXXC1           | ENSG00000154832 | 0.133474273                                                 | 5.641158 | 1.052315 | 0.294804   | 0.78697692  | -5.75724    |
|                      | IRF3            | ENSG00000126456 | 0.114885831                                                 | 5.866038 | 0.728406 | 0.467807   | 0.85997536  | -6.03635    |
| ZNF524               | ENSG00000171443 | 0.200066211     | 3.084672                                                    | 0.616106 | 0.53901  | 0.88553754 | -6.10965    |             |
